# Supplementary material for: Lanthanide–polyoxometalate-based self-erasing luminescent hydrogels with time-dependent and resilient properties for advanced information encryption
Source: Royal Society of Chemistry journal article supplement (doi:10.1039/d4mh01451k), 2025-01-01
Supplement: d4mh01451k1.pdf [file d4mh01451k1.pdf]

## Supplementary Information

# Lanthanide-polyoxometalate-based self-erasing luminescent hydrogels with time-dependent and resilient properties for advanced information encryption

Yumei Hua,<sup>a</sup> Jingfang Li,<sup>\*a</sup> Min Gao,<sup>a</sup> Liye Liang,<sup>a</sup> Sicong Zhao<sup>b</sup> and Guangming Li<sup>\*a</sup>

<sup>a</sup>Key Laboratory of Functional Inorganic Material Chemistry (MOE), School of Chemistry and Materials Science, Heilongjiang University, Harbin 150080, China.

<sup>b</sup>Key Laboratory of Advanced Manufacturing and Intelligent Technology (MOE), School of Material Science and Chemical Engineering, Harbin University of Science and Technology, Harbin 150040, China.

E-mail\*: [fjlaaa.ok@163.com](mailto:fjlaaa.ok@163.com), [gml@hlju.edu.cn](mailto:gml@hlju.edu.cn).

## Experimental section

**Materials:** Sodium tungstate dihydrate ( $\geq 99.5\%$ ), dysprosium nitrate pentahydrate (99.99%), acetic acid (99%), acrylamide (AAM, 99%), *N,N'*-methylenebis (acrylamide) (MBA, 99%), [2-(methacryloyloxy)ethyl] trimethyl ammonium chloride solution (DMC, 75%), potassium persulfate (KPS, 99.99%), tetramethylethylenediamine (TMEDA, 99%), urease ( $\geq 45$  units/mg), and urea ( $\geq 99.5\%$ ) were provided by Shanghai Aladdin Reagent Co., Ltd.

**Synthesis and characterization of DyW<sub>10</sub>:** Na<sub>2</sub>WO<sub>4</sub>·2H<sub>2</sub>O (4.12 g) was dissolved in 10 mL deionized water and the solution was heated to 90 °C and adjusted the pH to about 6.7 using acetic acid. Dy(NO<sub>3</sub>)<sub>3</sub>·5H<sub>2</sub>O (0.54 g) was dissolved in 1 mL deionized water. Then the Dy(NO<sub>3</sub>)<sub>3</sub> solution was added into the Na<sub>2</sub>WO<sub>4</sub> solution slowly under stirring at 90 °C. The crystals were acquired after cooling the solution to room temperature and were filtered and dried in the air.<sup>1</sup> As depicted in Fig. 1a, four characteristic peaks of DyW<sub>10</sub> appeared at wavenumbers of 935 cm<sup>-1</sup> was attributed to  $\nu$  (W=O<sub>d</sub>), 848 cm<sup>-1</sup> was attributed to  $\nu$  (W-O<sub>b</sub>-W), 794 cm<sup>-1</sup> and 709 cm<sup>-1</sup> were attributed to  $\nu$  (W-O<sub>c</sub>-W), respectively.<sup>2,3</sup> The thermogravimetry analysis (TGA) showed that the weight loss was 6.4% when heated to  $\sim 338$  °C, which was attributed to the loss of 11 water molecules, as shown in Fig. S1. The above results suggested that lanthanide-polyoxometalate Na<sub>9</sub>DyW<sub>10</sub>O<sub>36</sub>·11H<sub>2</sub>O has been synthesized successfully.

**Measurements:** Attenuated total reflection Fourier transform infrared (ATR FT-IR) spectra were tested by a PerkinElmer Frontier. The TGA curve was determined by a NETZSCH STA2500 analyzer. The storage modulus G' and loss modulus G'' were measured by a HAAKE MARS60 rheometer. Scanning electron microscopy (SEM) image was obtained on a JEOL JSM-5600LV instrument. Optical transmittance spectra were performed on a PerkinElmer LAMBDA 750 spectrophotometer and the thickness of hydrogels were 2 mm. The tensile data was obtained from a ZQ-990LB device. Luminescence spectra were collected on a PerkinElmer FL6500 spectrometer. Luminescence lifetimes were carried out on a FLS 920 Edinburgh spectrophotometer. The number of water molecules  $q$  coordinated at the center of dysprosium was calculated according to the following equation:

$$q = 2.61 \times 10^{-2} (1/\tau_{\text{H}_2\text{O}} - 1/\tau_{\text{D}_2\text{O}}) \quad (1)$$

where  $\tau$  are the reciprocal experimental lifetimes in H<sub>2</sub>O and D<sub>2</sub>O solutions in ms, respectively.<sup>4</sup>

**Rheological test of hydrogel.** The cylindrical hydrogel with 30 mm in diameter and 2 mm in

height was applied for rheological test using a parallel plate. The storage modulus  $G'$  and loss modulus  $G''$  were measured at a constant strain of 1 % and the frequency range of 0.1 - 100 Hz.

**Mechanical tests of hydrogels.** The dumbbell hydrogels were applied for tensile tests, with a width of 13 mm, a thickness of 2 mm, the gauge length of 45 mm, and the tensile rate was 100 mm/min. Moreover, the similar method was applied for mechanical tests of the hydrogels after treatment with HCl-urea mixed solution for 1.5 min immediately.

**Water loss tests of hydrogels.** The water retention was determined by measuring the weight of hydrogel at different conditions. The water loss ratio of the hydrogel was calculated using the following equation:

$$\text{Water loss (\%)} = (W_0 - W_t) / W_0 \quad (2)$$

where  $W_0$  is the mass of original hydrogel, and  $W_t$  is the mass of hydrogel at some time.<sup>5</sup>

The different humidity environment (68% and 98% relative humidity) were obtained by using saturated aqueous solutions of  $\text{CuCl}_2$  and distilled water.<sup>6</sup>

**Puncture resistance test of hydrogel.** The square hydrogel (32 mm  $\times$  32 mm  $\times$  2 mm) was applied for puncture resistance test by using a sharp steel thorn.

**Cutting resistance test of hydrogel.** The semi-cylindrical hydrogel (8 mm in diameter and 5 mm in height) was applied for cutting resistance test using a knife and the cutting speed was 2 mm/s.

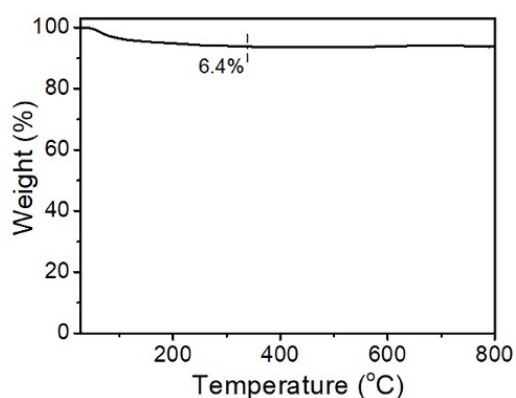

**Fig. S1** TGA curve of DyW<sub>10</sub>.

**Table S1** Recipes of PAAm/DyW<sub>10</sub>/urease hydrogels with different contents of AAm, DMC, DyW<sub>10</sub> and urease.

| Samples                                                                        | H <sub>2</sub> O (mL) | AAm (mmol) | MBA (mmol) | DMC (mmol) | KPS (mmol) | DyW <sub>10</sub> (mmol) | urease (mg mL <sup>-1</sup> ) | TMEDA (mmol) |
|--------------------------------------------------------------------------------|-----------------------|------------|------------|------------|------------|--------------------------|-------------------------------|--------------|
| PAAm <sub>8</sub> /(DyW <sub>10</sub> ) <sub>0.02</sub> /urease <sub>5</sub>   | 6                     | 8          | 0.012      | 0.180      | 0.06       | 0.020                    | 5                             | 0.06         |
| PAAm <sub>12</sub> /(DyW <sub>10</sub> ) <sub>0.02</sub> /urease <sub>5</sub>  | 6                     | 12         | 0.012      | 0.180      | 0.06       | 0.020                    | 5                             | 0.06         |
| PAAm <sub>16</sub> /(DyW <sub>10</sub> ) <sub>0.02</sub> /urease <sub>5</sub>  | 6                     | 16         | 0.012      | 0.180      | 0.06       | 0.020                    | 5                             | 0.06         |
| PAAm <sub>16</sub> /(DyW <sub>10</sub> ) <sub>0.01</sub> /urease <sub>5</sub>  | 6                     | 16         | 0.012      | 0.090      | 0.06       | 0.010                    | 5                             | 0.06         |
| PAAm <sub>16</sub> /(DyW <sub>10</sub> ) <sub>0.005</sub> /urease <sub>5</sub> | 6                     | 16         | 0.012      | 0.045      | 0.06       | 0.005                    | 5                             | 0.06         |
| PAAm <sub>16</sub> /(DyW <sub>10</sub> ) <sub>0.02</sub> /urease <sub>3</sub>  | 6                     | 16         | 0.012      | 0.180      | 0.06       | 0.020                    | 3                             | 0.06         |
| PAAm <sub>16</sub> /(DyW <sub>10</sub> ) <sub>0.02</sub> /urease <sub>1</sub>  | 6                     | 16         | 0.012      | 0.180      | 0.06       | 0.020                    | 1                             | 0.06         |
| PAAm <sub>16</sub> /urease <sub>5</sub>                                        | 6                     | 16         | 0.012      | 0.180      | 0.06       | 0                        | 5                             | 0.06         |
| PAAm <sub>16</sub> /(DyW <sub>10</sub> ) <sub>0.02</sub>                       | 6                     | 16         | 0.012      | 0.180      | 0.06       | 0.020                    | 0                             | 0.06         |

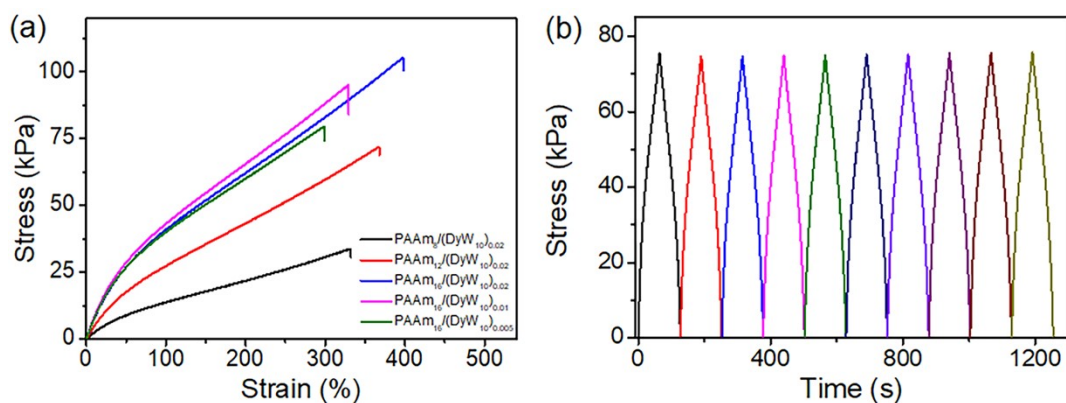

**Fig. S2** (a) The representative tensile stress-strain curves of PAAm/DyW<sub>10</sub>/urease<sub>5</sub> hydrogels with different contents of AAm and DyW<sub>10</sub>, respectively. (b) Antifatigue test curve of PAAm<sub>16</sub>/(DyW<sub>10</sub>)<sub>0.02</sub>/urease<sub>5</sub> hydrogel.

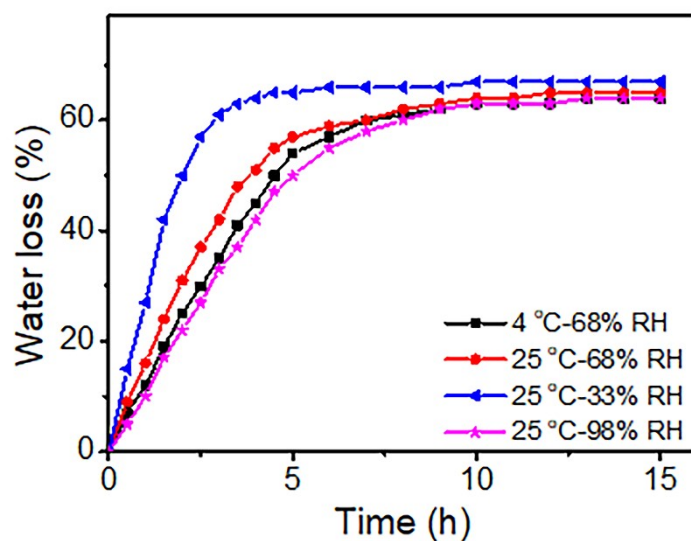

**Fig. S3** Water loss ratio of PAAM<sub>16</sub>/(DyW<sub>10</sub>)<sub>0.02</sub>/urease<sub>5</sub> hydrogel at different temperatures and relative humidity.

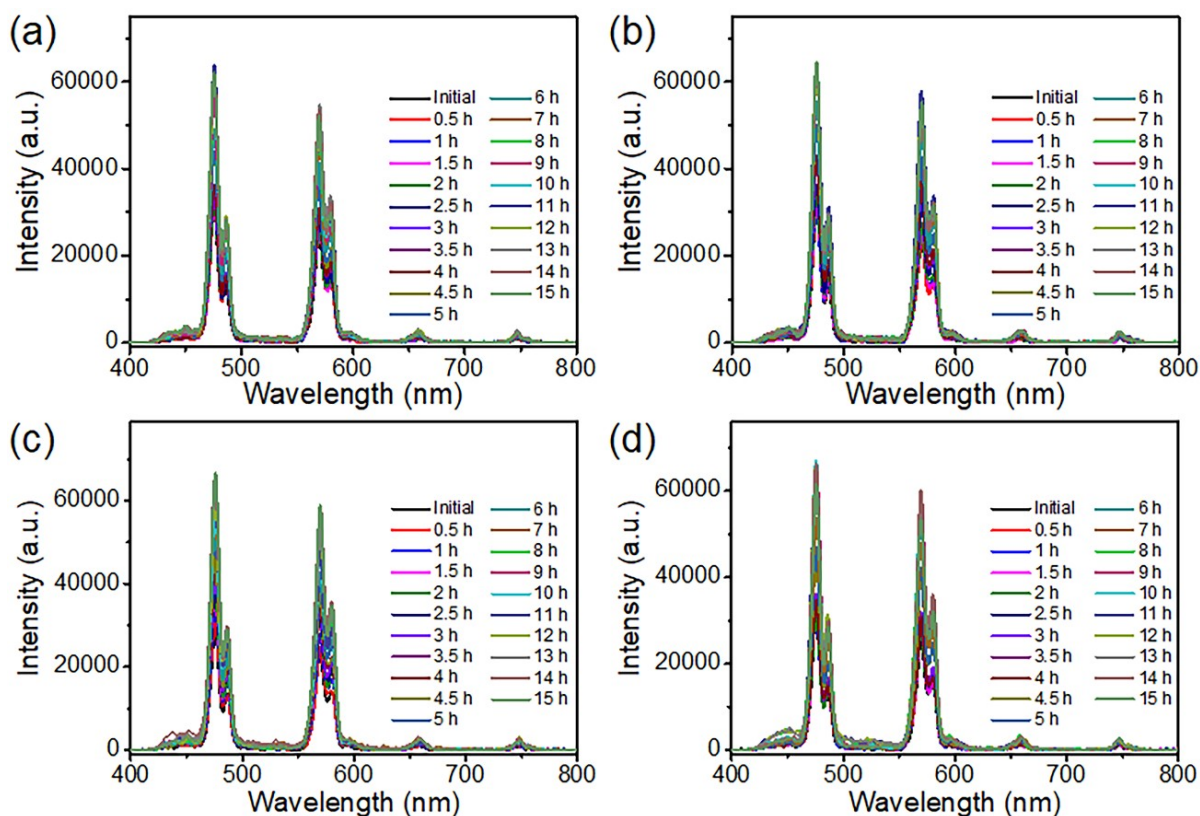

**Fig. S4** Time-dependent emission spectra of PAAM<sub>16</sub>/(DyW<sub>10</sub>)<sub>0.02</sub>/urease<sub>5</sub> hydrogel at different temperatures and relative humidity ( $\lambda_{\text{ex}} = 286 \text{ nm}$ ). (a) 4 °C, 68% RH. (b) 25 °C, 68% RH. (c) Ambient condition: 25 °C, 33% RH. (d) 25 °C, 98% RH.

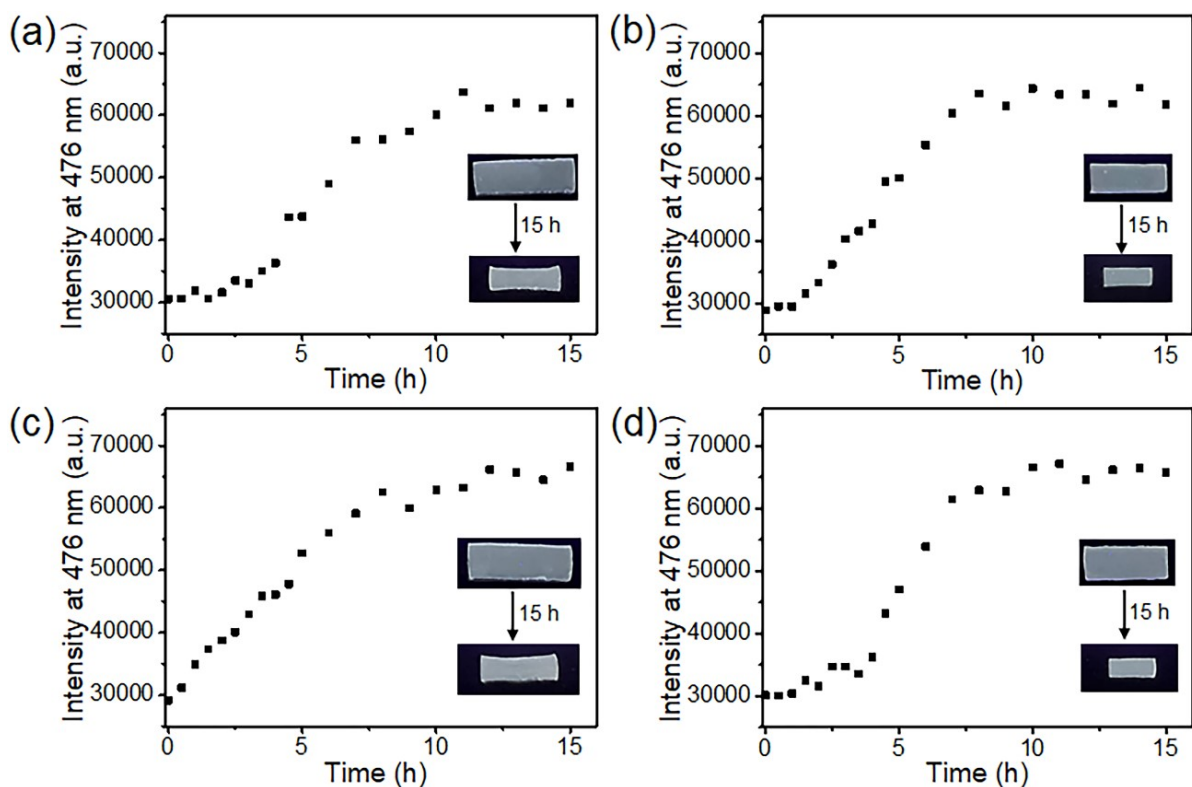

**Fig. S5** Time-dependent luminescence intensity and photographs of PAAm<sub>16</sub>/(DyW<sub>10</sub>)<sub>0.02</sub>/urease<sub>5</sub> hydrogel at different temperatures and relative humidity. (a) 4 °C, 68% RH. (b) 25 °C, 68% RH. (c) Ambient condition: 25 °C, 33% RH. (d) 25 °C, 98% RH.

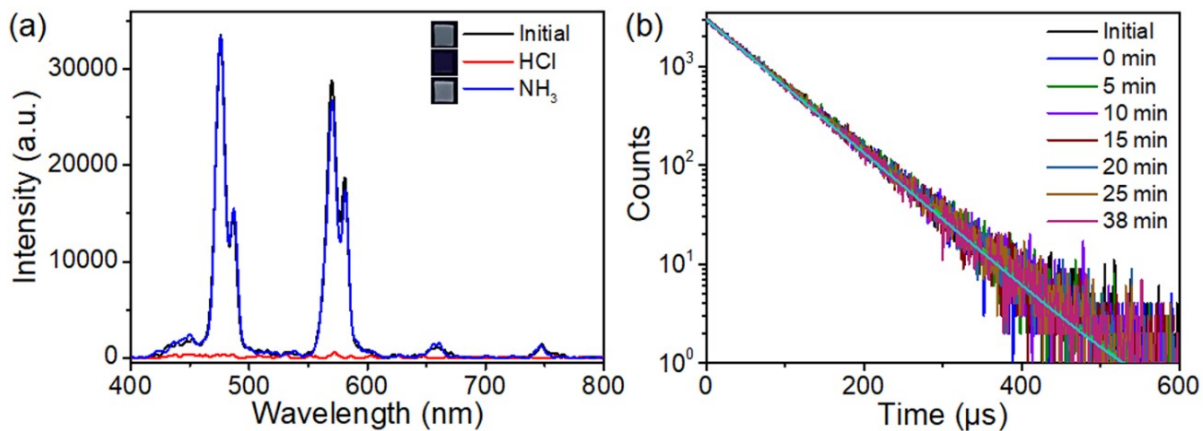

**Fig. S6** (a) Emission spectra of PAAm<sub>16</sub>/(DyW<sub>10</sub>)<sub>0.02</sub>/urease<sub>5</sub> hydrogel treated with HCl aqueous solution and NH<sub>3</sub> aqueous solution, and photographs were taken under UV light at 254 nm. (b) Time-dependent luminescence decay curves of PAAm<sub>16</sub>/(DyW<sub>10</sub>)<sub>0.02</sub>/urease<sub>5</sub> hydrogel ( $\lambda_{\text{ex}} = 286$  nm,  $\lambda_{\text{em}} = 476$  nm) after treatment with the HCl-urea mixed solution ( $c_{\text{HCl}}$ : 0.02 M and  $c_{\text{urea}}$ : 15 M).

**Table S2** Summary of time-dependent luminescence lifetimes of PAAm<sub>16</sub>/(DyW<sub>10</sub>)<sub>0.02</sub>/urease<sub>5</sub> hydrogel after treatment with the HCl-urea mixed solution ( $c_{\text{HCl}}$ : 0.02 M,  $c_{\text{urea}}$ : 15 M).

|                          | Initial | 0 min | 5 min | 10 min | 15 min | 20 min | 25 min | 38 min |
|--------------------------|---------|-------|-------|--------|--------|--------|--------|--------|
| $\tau$ ( $\mu\text{s}$ ) | 66.27   | 65.64 | 66.60 | 65.67  | 64.92  | 65.48  | 65.47  | 64.36  |

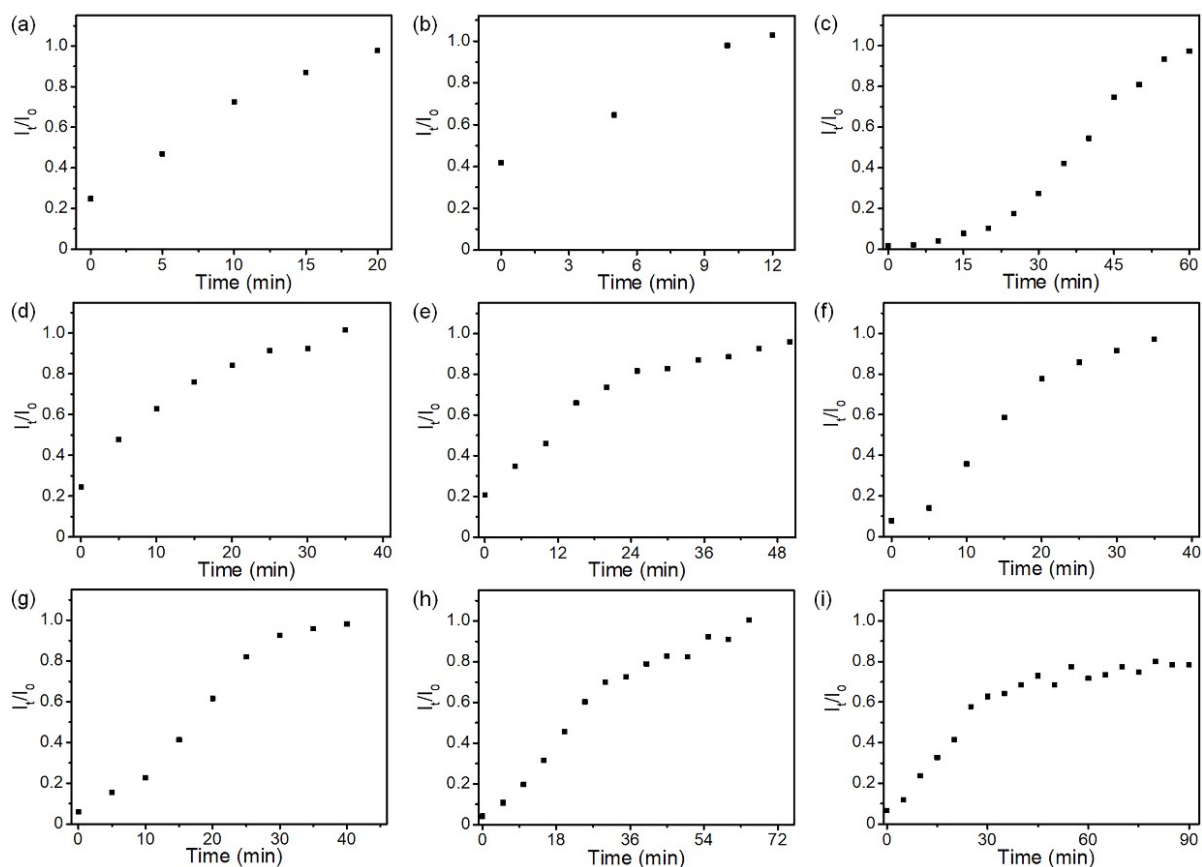

**Fig. S7** Time-dependent luminescence intensity ratio at 476 nm of the hydrogels with different urease concentrations after treatment with different concentrations of HCl-urea mixed solution ( $I_0$ : initial luminescence intensity,  $I_t$ : luminescence intensity at different time). (a)  $c_{\text{HCl}}$ : 0.02 M,  $c_{\text{urea}}$ : 15 M, and urease: 5 mg mL<sup>-1</sup>. (b)  $c_{\text{HCl}}$ : 0.01 M,  $c_{\text{urea}}$ : 15 M, and urease: 5 mg mL<sup>-1</sup>. (c)  $c_{\text{HCl}}$ : 0.1 M,  $c_{\text{urea}}$ : 15 M, and urease: 5 mg mL<sup>-1</sup>. (d)  $c_{\text{HCl}}$ : 0.02 M,  $c_{\text{urea}}$ : 15 M, and urease: 3 mg mL<sup>-1</sup>. (e)  $c_{\text{HCl}}$ : 0.02 M,  $c_{\text{urea}}$ : 15 M, and urease: 1 mg mL<sup>-1</sup>. (f)  $c_{\text{HCl}}$ : 0.02 M,  $c_{\text{urea}}$ : 1 M, and urease: 5 mg mL<sup>-1</sup>. (g)  $c_{\text{HCl}}$ : 0.02 M,  $c_{\text{urea}}$ : 0.1 M, and urease: 5 mg mL<sup>-1</sup>. (h)  $c_{\text{HCl}}$ : 0.02 M,  $c_{\text{urea}}$ : 0.05 M, and urease: 5 mg mL<sup>-1</sup>. (i)  $c_{\text{HCl}}$ : 0.02 M,  $c_{\text{urea}}$ : 0.01 M, and urease: 5 mg mL<sup>-1</sup>.



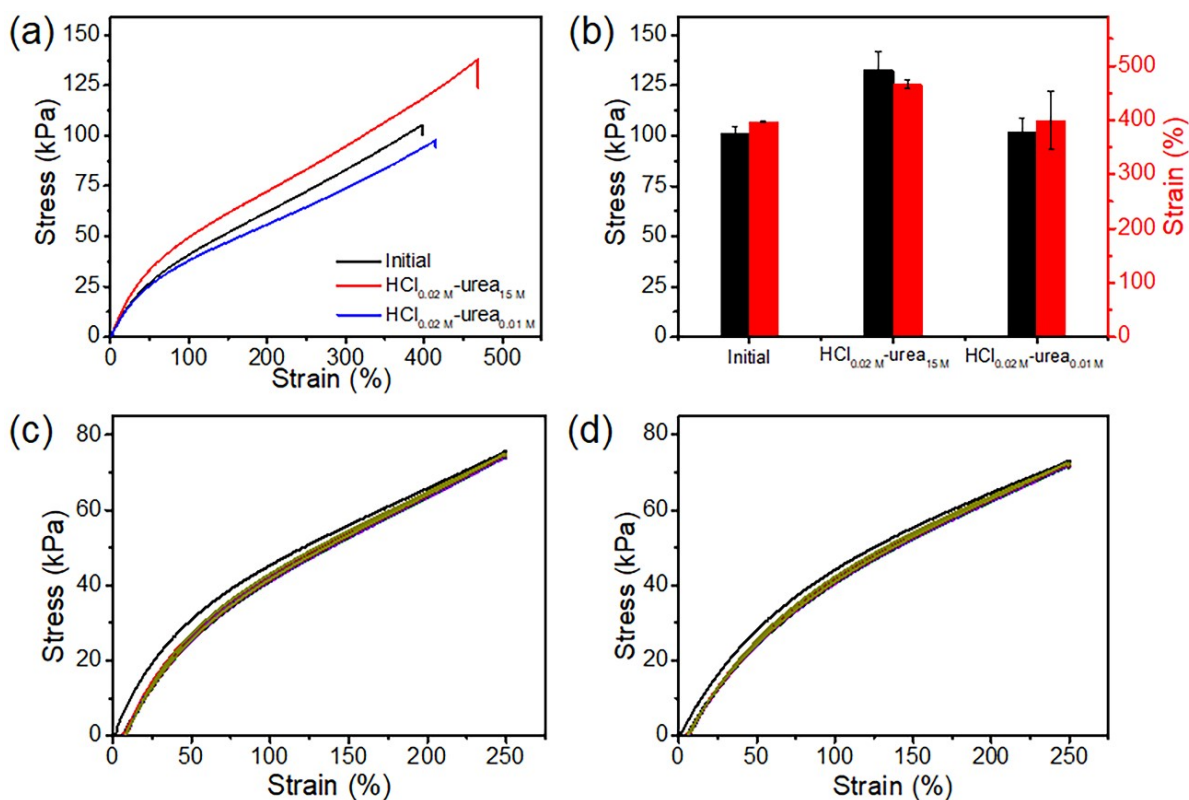

**Fig. S8** (a) The representative tensile stress-strain curves of PAAm<sub>16</sub>/(DyW<sub>10</sub>)<sub>0.02</sub>/urease<sub>5</sub> hydrogel after treatment with different concentrations of HCl-urea mixed solution. (b) The maximum stress and maximum strain of PAAm<sub>16</sub>/(DyW<sub>10</sub>)<sub>0.02</sub>/urease<sub>5</sub> hydrogel after treatment with different concentrations of HCl-urea mixed solution. Cyclic tensile curves of PAAm<sub>16</sub>/(DyW<sub>10</sub>)<sub>0.02</sub>/urease<sub>5</sub> hydrogel after treatment with different concentrations of HCl-urea mixed solution. (c) c<sub>HCl</sub>: 0.02 M and c<sub>urea</sub>: 15 M. (d) c<sub>HCl</sub>: 0.02 M and c<sub>urea</sub>: 0.01 M.

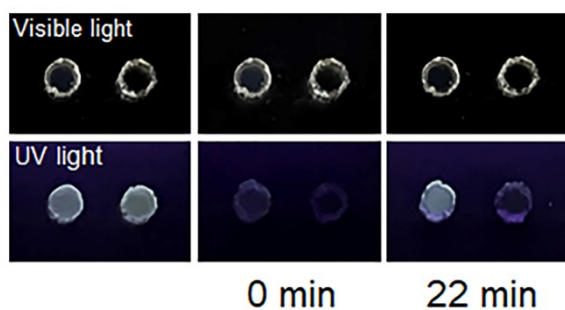

**Fig. S9** The real information can only be recognized at a specific time with the help of a Morse code.



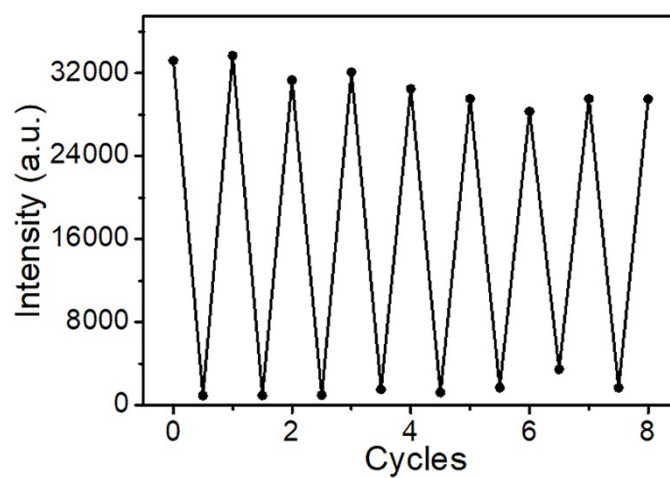

**Fig. S10** Cyclic luminescence switching process of PAAm<sub>16</sub>/(DyW<sub>10</sub>)<sub>0.02</sub>/urease<sub>5</sub> hydrogel ( $c_{\text{HCl}}$ : 0.02 M and  $c_{\text{urea}}$ : 0.05 M).

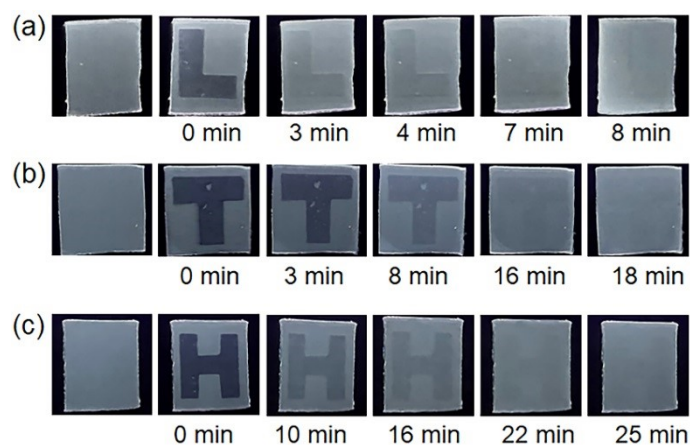

**Fig. S11** The self-erasing process of information at different temperatures and photographs were taken under UV light at 254 nm. (a) 40 °C, (b) 25 °C, (c) 4 °C.

**Table S3** pH of different concentrations of HCl-urea mixed solution.

| $c_{\text{HCl}}$ (M) | $c_{\text{urea}}$ (M) | pH  |
|----------------------|-----------------------|-----|
| 0.5                  | 15                    | 1.6 |
| 0.1                  | 15                    | 2.4 |
| 0.02                 | 15                    | 3.2 |
| 0.01                 | 15                    | 3.4 |
| 0.005                | 15                    | 3.8 |
| 0.02                 | 0.01                  | 2.0 |
| 0.02                 | 0.05                  | 2.0 |
| 0.02                 | 0.1                   | 2.1 |
| 0.02                 | 1                     | 2.2 |

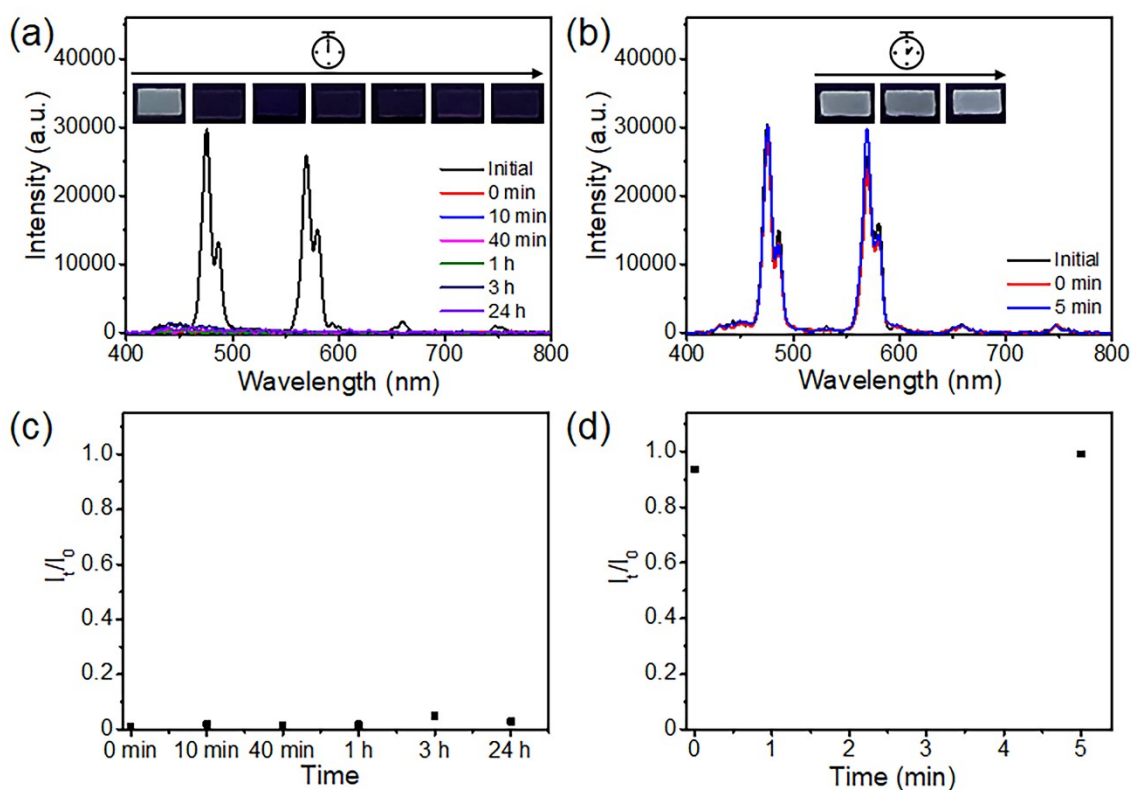

**Fig. S12** Time-dependent emission spectra of PAAm<sub>16</sub>/(DyW<sub>10</sub>)<sub>0.02</sub>/urease<sub>5</sub> hydrogel at different pH of HCl-urea mixed solution and photographs were taken under UV light at 254 nm. (a) pH = 1.6. (b) pH = 3.8. Time-dependent luminescence intensity ratio of PAAm<sub>16</sub>/(DyW<sub>10</sub>)<sub>0.02</sub>/urease<sub>5</sub> hydrogel at different pH of HCl-urea mixed solution ( $I_0$ : initial luminescence intensity,  $I_t$ : luminescence intensity at different time). (c) pH = 1.6. (d) pH = 3.8.

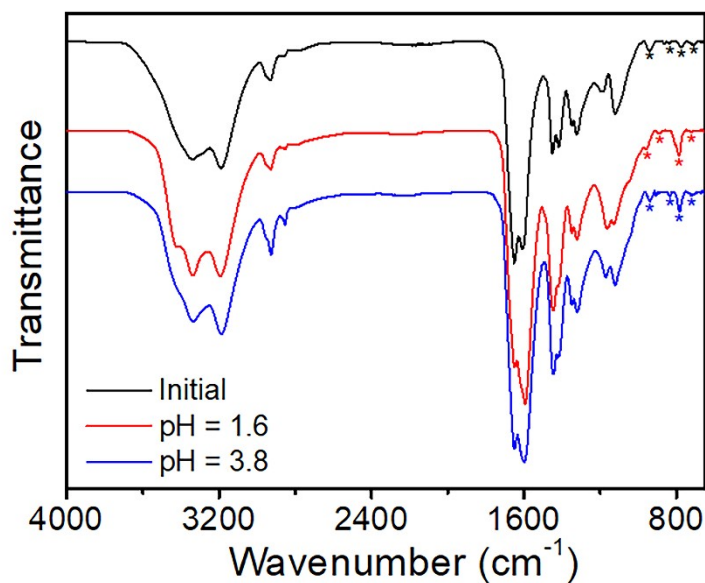

**Fig. S13** ATR FT-IR spectra of dried PAAm<sub>16</sub>/(DyW<sub>10</sub>)<sub>0.02</sub>/urease<sub>5</sub> hydrogel, and dried PAAm<sub>16</sub>/(DyW<sub>10</sub>)<sub>0.02</sub>/urease<sub>5</sub> hydrogel at different pH of HCl-urea mixed solution.

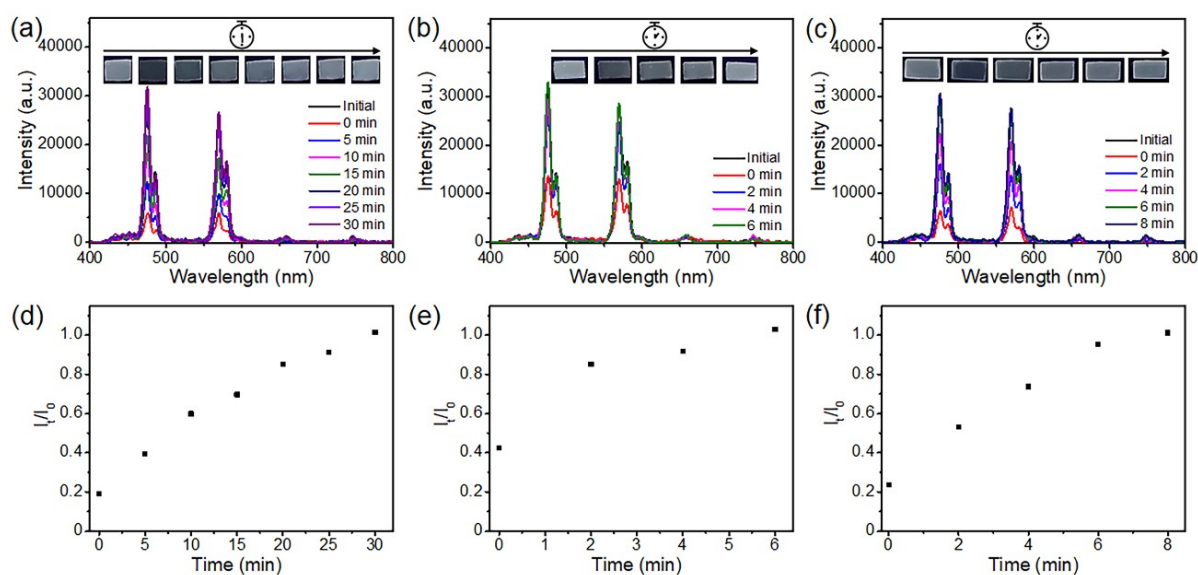

**Fig. S14** Time-dependent emission spectra of PAAm<sub>16</sub>/(DyW<sub>10</sub>)<sub>0.02</sub>/urease<sub>5</sub> hydrogel at different temperatures and photographs were taken under UV light at 254 nm. (a) 0 °C. (b) 60 °C. (c) 80 °C. Time-dependent luminescence intensity ratio of PAAm<sub>16</sub>/(DyW<sub>10</sub>)<sub>0.02</sub>/urease<sub>5</sub> hydrogel at different temperatures ( $I_0$ : initial luminescence intensity,  $I_t$ : luminescence intensity at different time). (d) 0 °C. (e) 60 °C. (f) 80 °C.

## Notes and references

- 1 J. Cuan and B. Yan, *RSC Adv.*, 2014, **4**, 1735–1743.
- 2 L. Liang, N. Sun, Y. Yu, S. Ren, A. Wu and L. Zheng, *Soft Matter*, 2020, **16**, 2311–2320.
- 3 M. A. AlDamen, S. Cardona-Serra, J. M. Clemente-Juan, E. Coronado, A. Gaita-Ariño, C. Martí-Gastaldo, F. Luis and O. Montero, *Inorg. Chem.*, 2009, **48**, 3467–3479.
- 4 H. Wei, J. Zhang, N. Shi, Y. Liu, B. Zhang, J. Zhang and X. Wan, *Chem. Sci.*, 2015, **6**, 7201–7205.
- 5 Y. Gao, F. Jia and G. Gao, *Chem. Eng. J.*, 2022, **430**, 132919.
- 6 D. Xia, J. Li, W. Li, L. Jiang and G. Li, *J. Lumin.*, 2021, **231**, 117784.
